1 Investigation of novel functions of three genes in oriental river prawn, *Macrobrachium*  
2 *nipponense*: Molecular Cloning, Expression, and *In situ* Hybridization Analysis

3 Shubo Jin<sup>1</sup>, Hongtuo Fu<sup>1,2\*</sup>, Yuning Hu<sup>2</sup>, Shengming Sun<sup>1</sup>, Sufei Jiang<sup>1</sup>, Yiwei Xiong<sup>1</sup>, Hui  
4 Qiao<sup>1</sup>, Wenyi Zhang<sup>1</sup>, Yongsheng Gong<sup>1</sup>, Yan Wu<sup>1</sup>

5 1. Key Laboratory of Freshwater Fisheries and Germplasm Resources Utilization,  
6 Ministry of Agriculture, Freshwater Fisheries Research Center, Chinese Academy of Fishery  
7 Sciences, Wuxi 214081, China

8 2. Wuxi Fisheries College, Nanjing Agricultural University, Wuxi 214081, China

9 \*Corresponding author: Hongtuo Fu

10 Freshwater Fisheries Research Center, Chinese Academy of Fishery Sciences

11 9 Shanshui East Road, Wuxi 214081, Jiangsu Province, P. R. China

12 E-mail address: [fuht@ffrc.cn](mailto:fuht@ffrc.cn)

13 Tel.: +86.510 85558835

## 14 **Abstract**

15 Three genes were predicted to be potentially involved in the male sexual development in *M.*  
16 *nipponense*, including the Gem-associated protein 2-like isoform X1 (GEM), Ferritin peptide,  
17 and DNA polymerase zeta catalytic subunit (Rev3). In this study, we aimed to investigate their  
18 novel functions in depth. The full-length cDNA sequence of Mn-GEM was 1,018 bp, encoding  
19 258 amino acids. The partial Mn-Rev3 cDNA sequence was 6,832 bp, encoding 1,203 amino  
20 acids. Tissue distribution indicated that all of these three genes have higher expression level in  
21 testis and androgenic gland, implying their novel functions in male sexual development. *In situ*  
22 hybridization analysis further confirmed the novel roles of these three genes. Rev3 promote the

23 testis development during the whole reproductive cycle, while GEM and ferritin only promote  
24 the activation of testis development. Besides, these three genes play essential roles in funicular  
25 structure development surrounding the androgenic gland cells, which promote and support the  
26 formation of androgenic gland cells. The expression in hepatopancreas cells also suggested  
27 their role in immune system in *M. nipponense*. This study advances our understanding of male  
28 sexual development in *M. nipponense*, as well as providing the basis for further studies of male  
29 sexual differentiation and development in crustaceans.

30 **Keywords:** *Macrobrachium nipponense*; Male sexual development; Gem-associated  
31 protein 2-like isoform X1; DNA polymerase zeta catalytic subunit; Ferritin peptide; Expression  
32 pattern; *In situ* hybridization.

### 33 **Introduction**

34 The oriental river prawn, *Macrobrachium nipponense* (Crustacea; Decapoda; Palaemonidae),  
35 are widely distributed in freshwater and low-salinity estuarine regions of China and other Asian  
36 countries [1-5]. It is a commercially important species with an annual aquaculture production  
37 of 205,010 tons [6]. The growth performance of male *M. nipponense* and female *M. nipponense*  
38 showed significant difference during the *M. nipponense* aquaculture. “Male prawns of *M.*  
39 *nipponense* grow faster and reach larger size at the harvest time than their female counterparts”  
40 [4-5]. The establishment of an artificial techniques to produce all male progeny on a  
41 commercial scale is a long-term goal in *M. nipponense* aquaculture. Therefore, it is urgently  
42 needed to fully understand the sex differentiation and determination mechanisms of *M.*  
43 *nipponense*.

44 The androgenic gland is found in most crustaceans, producing hormones, which promote  
45 the driving of male sexual differentiation, the establishment of male sexual characteristics, and

46 the development of the testes [7]. The ablation of androgenic gland from male *Macrobrachium*  
47 *rosenbergii* prawn results in the sex reversal to the “neo-females”. All male progeny was  
48 generated when the “neo-females” were mated with normal male *M. rosenbergii* [7-9]. Thus,  
49 studies on androgenic gland is a hot topic on male sexual differentiation and development in  
50 crustacean species. The genes in the androgenic gland is of great importance to be fully  
51 understood, especially for those which may promote the male differentiation and development.  
52 The androgenic gland transcriptome and miRNA library have both been constructed for *M.*  
53 *nipponense* [10-11]. A series of genes identified in the androgenic gland transcriptome have  
54 been analyzed and proven to be involved in the sex-differentiation and determination  
55 mechanism of *M. nipponense* [12-15].

56 iTRAQ technique was used to perform the quantitative proteomic analysis of androgenic  
57 gland during the nonreproductive and reproductive season in *M. nipponense*. A total of 3  
58 differentially expressed proteins (DEPs) showed highest expression level in androgenic gland,  
59 compared with those in testis and ovary, including Gem-associated protein 2-like isoform X1  
60 (GEM), Ferritin peptide, and DNA polymerase zeta catalytic subunit (Rev3) [16]. According  
61 to the previous studies, ferritin peptide and Rev3 have been proven to be involved in the  
62 immune system maintenance. Ferritin peptide has been analysed in *M. nipponense*, which plays  
63 essential roles in its innate immune defence, especially for that in cellular and organismic iron  
64 homeostasis [17]. However, these 3 DEPs might play essential roles in male sexual  
65 development in *M. nipponense*, based on their higher expression levels in androgenic gland  
66 and the importance of the androgenic gland in male sex differentiation and sex determination  
67 in crustacean species. The roles in male sexual development might be the novel functions that  
68 did not report yet.

69 In this study, we aimed to further analyse their functions in *M. nipponense* in depth,  
70 especially for the important roles in male sexual roles. The full-length cDNA sequences from

71 *M. nipponense* were cloned and their structural characteristics were analysed. The mRNA  
72 expression patterns in different tissues and reproductive cycle of testis were determined by  
73 quantitative real-time PCR (qPCR), and their locations were further determined by *in situ*  
74 hybridization. The results of this study provide the foundations for male sexual development  
75 in *M. nipponense*, as well as that in other crustacean species.

## 76 **Materials and methods**

### 77 **Ethics Statement**

78 As described in detail previously [10], the prawns were obtained from the Tai Lake in Wuxi,  
79 China. We got the permission from the Tai Lake Fishery Management Council. *M. nipponense*  
80 is a normal species with huge production in China, which can be used for experimental  
81 materials. All the experimental animal programs involved in this study were followed the  
82 experimental basic principles, approved by committee of Freshwater Fisheries Research  
83 Institute. MS222 anesthesia was used for each prawn when androgenic glands were collected,  
84 in order to minimize suffering.

### 85 **Prawn and Tissue Preparation**

86 As described in detail previously [13], healthy adult *M. nipponense* with wet weight of 3.78-  
87 5.26g were obtained from Tai Lake in Wuxi, China (120°13'44"E, 31°28'22"N). These  
88 specimens were maintained in aerated freshwater under lab conditions at the temperature of  
89 28°C for at least 72 h prior to tissue collection. A total of 6 tissues were collected from mature  
90 prawns for qPCR analysis, including ovaries, testes, androgenic glands, heart, intestine and  
91 hepatopancreas, in order to determine the mRNA expression levels in different tissues. An  
92 additional androgenic gland was collected for Rapid Amplification of cDNA Ends (RACE)  
93 cloning. The Olympus SZX16 dissecting microscope was used to extract the androgenic glands.  
94 Testis in reproductive season at the temperature of 28°C and testis in non-reproductive season

95 at the temperature of 15°C were collected, in order to determine the expression levels in  
96 reproductive cycle of testis. The samples were treated with phosphate buffer saline (PBS), and  
97 immediately frozen in liquid nitrogen until used for RNA extraction to prevent total RNA  
98 degradation.

### 99 **Rapid Amplification of cDNA Ends (RACE)**

100 As described in detail previously [13], total RNA was extracted from androgenic gland as  
101 template using RNAliso Plus Reagent (Takara Bio Inc.), followed the protocol of the  
102 manufacturer. The RNase-free DNase I (Sangon, Shanghai, China) was used to treat the  
103 isolated RNA to eliminate possible genomic DNA contamination. BioPhotometer (Eppendorf,  
104 Hamburg, Germany) was used to measure the concentration of the total RNA sample with the  
105 A260/A280 in the range of 1.8-2.0. The RNA quality was then measured by 1% agarose gel.

106 As described in detail previously [13], a M-MLV reverse transcriptase was used to  
107 perform the first strand 3'cDNA and 5'cDNA synthesis for gene cloning using the 3'-Full  
108 RACE Core Set Ver.2.0 kit and the 5'-Full RACE kit (Takara Bio Inc., Japan), respectively  
109 with the reaction conditions recommended by the manufacturer. The synthesized cDNAs were  
110 kept at -20°C. 3'/5'-RACE PCR reactions were performed with the 3' gene-specific primer  
111 (GEM-3GSP1, GEM-3GSP2, Rev3-3GSP1, Rev3-3GSP2) or 5'GSP (GEM-5GSP1, GEM-  
112 5GSP2) (Table.1). The partial unigene sequences were obtained from the *M. nipponense*  
113 androgenic gland transcriptome, and the 3'GSP and 5'GSP of each gene were designed based  
114 on the unigene sequence. 1% agarose gel was used to measure the PCR product.

115 As described in detail previously [13], the Gel Extraction kit (Sangon, shanghai,China)  
116 was used to cut and purify the PCR products, following the manufacturer's instructions.  
117 Amplified cDNA fragments were transferred into the pMD18-T vector (Takara Bio Inc., Japan).  
118 Recombinant bacteria were identified by blue/white screening and confirmed by PCR. An

119 automated DNA sequencer (ABI Biosystem, USA) was used to determine the nucleotide  
120 sequences of the cloned cDNAs. BLAST software (<http://www.ncbi.nlm.nih.gov/BLAST/>)  
121 was used to examine the nucleotide sequence similarities.

## 122 **Nucleotide Sequence and Bioinformatics Analyses**

123 As described in detail previously [13], the primer designing tool  
124 (<http://www.ncbi.nlm.nih.gov/tools/primer-blast/>) was used to design all primers used in this  
125 experiment. The 5' and 3' sequences from RACEs were assembled with the partial cDNA  
126 sequence corresponding to each fragmental sequence by DNAMAN 5.0. The BLASTX and  
127 BLASTN search program (<http://www.ncbi.nlm.nih.gov/BLAST/>) of GenBank was used to  
128 analyse the sequences based on the nucleotide and protein databases using. The ORF Finder  
129 tool (<http://www.ncbi.nlm.nih.gov/gorf/gorf.html>) was used to predict the open reading frame.  
130 ClustalW1.81 was used to perform multiple sequence alignment. Molecular Evolutionary  
131 Genetics Analysis, MEGA 5.1 was used to construct the phylogenetic trees based on the amino  
132 acid sequences using the neighbor-joining method.

## 133 **Various Reproductive Cycle of Testis and Various Tissues Expression by qPCR**

134 As described in detail previously [13], qPCR was used to measure the relative mRNA  
135 expression of Mn-GEM, Mn-Rev3 and Mn-Ferritin at various adult tissues and various  
136 reproductive cycle of testis. Each tissue sample was dissected out from at least 3 mature prawns.  
137 RNAiso Plus Reagent (TaKaRa) was used to extract and isolate the total RNA from various  
138 tissues of adult prawns and different reproductive cycle of testis, following the manufacturer's  
139 instructions. The concentration and quality of each total RNA sample was measured by  
140 BioPhotometer (Eppendorf) with A260/A280 as 1.8-2.0, and 1% agarose gel. Experiments  
141 were performed in triplicate. Approximately 1µg of total RNA from each tissue was used for  
142 the first-strand cDNA synthesis using iScript™ cDNA Synthesis Kit perfect Real Time (Bio-

143 Rad, CA, USA) and following the manufacturer's instructions. The synthesized cDNA  
144 template for qPCR was kept at -20°C. The qPCR primers of each gene were designed based on  
145 the open reading frame. The Bio-Rad iCycler iQ5 Real-Time PCR System (Bio-Rad) was used  
146 to carry out the SYBR Green RT-qPCR assay.  $\beta$ -actin was used as an internal reference to  
147 amplify for the same sample (the primer's sequences are shown in Table 1).  
148 Diethypyrocarbonate-water (DEPC-water) for the replacement of template was used as a  
149 negative control. All samples were run in triplicate (each duplicate for target gene and  $\beta$ -actin  
150 gene). The relative mRNA expression of each gene was calculated based on the  $2^{-\Delta\Delta CT}$   
151 comparative CT method. There are many advantages of the  $2^{-\Delta\Delta CT}$  comparative CT method,  
152 including the ease of use and the ability of the data as "fold change" in expression. The  
153 amplification efficiency of target gene and  $\beta$ -actin were estimated by qPCR, using different  
154 concentrations of androgenic gland template. The androgenic gland templates include  
155 undiluted, two times diluted, four times diluted and eight times diluted sample. The slope of  
156 the Mn-GEM and  $\beta$ -actin at different concentrations of diluted samples were 1.393 and 1.411,  
157 respectively. The slope of the Mn-Rev3 and  $\beta$ -actin at different concentrations of diluted  
158 samples were 1.479 and 1.458, respectively. The slope of the Mn-Ferritin and  $\beta$ -actin at  
159 different concentrations of diluted samples were 1.576 and 1.583, respectively. Thus, the  
160 amplification efficiency between the target gene and  $\beta$ -actin are the same in this study. The  
161 tissue with lowest expression level was setted as 1 (a relative criterion), and other tissues were  
162 then compared with the relative criterion.

### 163 **In situ Hybridization of DEM, Rev3 and Ferritin peptide mRNA in testis, androgenic** 164 **gland and hepatopancreas**

165 As described in detail previously [13], 4% paraformaldehyde treated by DEPC water was used  
166 to fix the tissue samples for *in situ* hybridization study. Primer5 software was used to design  
167 the anti-sense and sense probes of CISH (Chromogenic in-situ hybridization) study with DIG

168 signal based on the cDNA sequence of each gene. The anti-sense and sense probes were then  
169 synthesized by Shanghai Sangon Biotech Company. Both of the anti-sense and sense probes  
170 were hybridized with the slide. The anti-sense probe and sense probe were prepared for the  
171 experimental group and control group, respectively. CISH study was performed on 4 $\mu$  thick  
172 formalin fixed paraffin-embedded sections using Zytofast PLUS CISH implementation kit  
173 (Zyto Vision GmbH, Germany). As described in detail previously [13], a standard  
174 deparaffinization technique was performed by 10 min incubation in 3% H<sub>2</sub>O<sub>2</sub>. Following  
175 rinsing in deionized water (DW), target retrieval was achieved using pepsin digestion in a  
176 humidity chamber for 10 min. Slides were incubated in EDTA solution at 95 for 15 min after  
177 washing in DW. Slides were washed in DW and drained off; 20  $\mu$ l of CISH anti-sense probe  
178 and sense probe were poured over each slide. Denaturation at 75 for 5 min was subsequently  
179 followed by hybridization at 37 for 60 min in the Thermobrite TM hybridization chamber  
180 (Vysis Inc., USA). Tris-buffered-saline (TBS) washing, at 55 and room temperature, each for  
181 five min was done concurrently. Mouse-anti-DIG (Zyto Vision GmbH, Germany) was poured  
182 drop-wise over each slide, and incubated in a humidity chamber at 37 for 30 min. Three  
183 washings, each for a minute with TBS was done, before and after incubating slides in anti-  
184 mouse-HRP-polymer for 30 min at room temperature. 3,3'-diaminobenzidine (DAB) solution  
185 was prepared as per guidelines (Zytofast PLUS CISH) and poured 50 $\mu$ l in each slide for 10 min  
186 at room temperature. After washing, a hematoxylin was used for counterstaining. Slides were  
187 dehydrated in graded alcohol solutions, air dried and mounted with mixture of distyrene,  
188 plasticizer and xylene (DPX). Slides were examined under light microscope for evaluation.

### 189 **Statistical Analysis**

190 Quantitative data were expressed as mean  $\pm$  SD. Statistical differences were estimated by one-  
191 way ANOVA followed by LSD and Duncan's multiple range test. All statistics were measured



192 using SPSS Statistics 13.0. A probability level of 0.05 was used to indicate significance ( $P <$   
193 0.05).

## 194 **Results**

### 195 **Sequences analysis**

196 The full-length Mn-DEM cDNA sequence was 1,018 bp with an open reading frame of 777 bp,  
197 encoding 258 amino acids. The 5' and 3' untranslated regions (UTRs) of Mn-DEM contained  
198 147 bp and 94 bp, respectively. The partial Mn-Rev3 cDNA sequence was 6,832 bp with an  
199 open reading frame of 3,612 bp, encoding 1,203 amino acids. The 3' untranslated regions  
200 (UTRs) of Mn-Rev3 contained 3220. The cDNA sequence of Mn-DEM and Mn-Rev3 have  
201 been submitted to GenBank with the accession no.MH817847 and MH817848, respectively.  
202 The relative information for Mn-Ferritin can be seen in previous study (Sun et al., 2014).

### 203 **Similarity comparison and phylogenetic analysis**

204 The species used for GEM amino acid sequence blast have been listed in Table 2. The identities  
205 between Mn-GEM and GEM in other species was 42%-47% revealed by the BLASTP  
206 similarity comparisons, while the query coverage reached to 98%. Mn-GEM has the highest  
207 identity with GEM sequence from *Acanthaster planci*. MEGA 5.1 was used to construct a  
208 condensed phylogenetic tree using the neighbour-joining method, in order to analyse the  
209 evolutionary relationship between Mn-GEM and other well-defined GEM sequences, based on  
210 their completed amino acid sequences deposited in NCBI. The phylogenetic tree generated two  
211 main branches; one including amino acid sequences from different species, and another  
212 separate branch only including *M. nipponense* (Figure 1-A). Mn-GEM has dramatically long  
213 evolutionary relationship with those from other species.

214 The species used for Rev3 amino acid sequence blast have been listed in Table 3. The  
215 identities between the Mn-Rev3 and Rev3 in other species was 39%-41%, and the query

216 coverage is only 35%. Mn-Rev3 has the highest identity with Rev3 sequence from *Orbicella*  
217 *faveolata*. Similar with that of Mn-GEM, *M. nipponense* is in a separate branch (Figure 1-B),  
218 revealed by phylogenetic tree using MEGA 5.1. Mn-GEM has dramatically long evolutionary  
219 relationship with those from other species.

## 220 **Expression analysis in different tissues and reproductive cycle of testis**

221 Tissue distribution may reflect the physiological function of a protein. qPCR was used to  
222 determine the tissue distributions of these three genes. According to the qPCR analysis, the  
223 mRNA expression of these three genes in testis and androgenic gland were higher than that in  
224 ovary (Figure 2). The expressions showed significant difference for Rev3 and ferritin peptide  
225 ( $p < 0.05$ ). Besides, the mRNA expression of Rev3 and ferritin showed high expression level in  
226 hepatopancreas, especially for that of Rev3. The expression was 22.1-fold higher than that in  
227 heart ( $p < 0.01$ ).

228 The mRNA expression of these three genes showed higher expression levels in  
229 reproductive season of testis than those in non-reproductive season and showed significant  
230 difference ( $p < 0.05$ ). The mRNA expressions of Mn-GEM, Mn-Rev3, and Mn-Ferritin in  
231 reproductive season were 2.31-fold, 2.97-fold and 2.67-fold higher than those in  
232 nonreproductive season (Figure 3).

## 233 **In situ Hybridization analysis**

234 To analyse the functions of these three genes in depth, the mRNA locations were determined  
235 in testis, androgenic gland and hepatopancreas by *in situ* hybridization. The fixed tissue  
236 samples were subjected to hematoxylin and eosin (HE) staining as well as *in situ* hybridization.  
237 According to the HE staining, mature testis includes spermatid, spermatocyte and sperms,  
238 whereas sperms were the dominant cells. Androgenic gland consisted of funicular structure and  
239 androgenic gland cells. Hepatopancreas includes the lipid granules and hepatopancreas cells.

240 According to the *in situ* hybridization analysis, strong signals for Rev3 mRNA in mature testis  
241 were observed in spermatid, spermatocyte and sperm in mature testis (Figure 5), while strong  
242 signals for GME and ferritin peptide were only observed in spermatid, no signals were observed  
243 in spermatocyte and sperms (Figure 4, Figure 6). In androgenic gland, strong signals were  
244 observed in funicular structure surrounding the androgenic gland cells for all of these three  
245 genes, while no signal was directly observed in androgenic gland cells. Strong signals were  
246 observed in hepatopancreas cells for all of these three genes, rather than that in lipid granules  
247 (Figure 4; Figure 5; Figure 6). No signals were observed when sense RNA probe was used.

## 248 Discussion

249 Three DEPs were identified from the quantitative proteomic analysis of androgenic gland from  
250 *M. nipponense* during non-reproductive and reproductive season, which showed the  
251 expressions with highest mRNA level in androgenic gland, compared with those in testis and  
252 ovary, including GEM, Rev3 and ferritin peptide. According to the important functions of  
253 androgenic gland in male sexual differentiation and development, these 3 DEPs were predicted  
254 to be strong candidate novel genes in the male sexual development in *M. nipponense*.  
255 According to the previous studies, ferritin peptide and Rev3 play essential roles in immune  
256 system maintenance [17-19]. In this study, we aimed to investigate their functions in *M.*  
257 *nipponense*, especially for the potentially novel roles in male sexual development. The full-  
258 length cDNA sequence of Mn-GEM was 1,018 bp with an open reading frame of 777 bp,  
259 encoding 258 amino acids. Mn-GEM has the highest identity with GEM sequence from  
260 *Acanthaster planci*, while the identity was only 41%. According to the phylogenetic analysis,  
261 Mn-GEM has dramatically long evolutionary relationship with those from other species. These  
262 suggest considerable evolutionary divergence between *M. nipponense* and other species in  
263 terms of GEM, consistent with BLASTP analysis. The partial cDNA sequence of Mn-Rev3  
264 was 6,832 bp with an opening reading frame of 3,612 bp, encoding 1203 amino acids. The full-

265 length cDNA sequence of Mn-Rev3 was hard to obtain by using 5'RACE cloning and  
266 homologous cloning because the absent cDNA sequence at 5'-terminal is too long and the  
267 degenerate primers were hard to designed due to long evolutionary relationship with the well-  
268 defined Rev3 sequences in other species. The full-length cDNA sequence of Mn-Rev3 will be  
269 obtained when the middle fragment is long enough. As the same as that of Mn-GEM, the  
270 similarity comparison analysis and phylogenetic analysis also showed a considerable  
271 evolutionary relationship between the Mn-Rev3 and the other well-defined sequences of Rev3  
272 in other species. A reasonable explanation for the long evolutionary relationship with well-  
273 defined sequences is that the GEM and Rev3 sequences were only identified and isolated from  
274 limited species, and to the best of our knowledge, no previous researches related to GEM and  
275 Rev3 were found in crustacean species.

276 To the best of our knowledge, the functions of GEM have not been well defined and  
277 analysed. Rev3 and ferritin peptide have been proven to play essential roles in the immune  
278 system maintenance, based on the previous studies. In cultured human fibroblasts, Rev3  
279 decrease the UV-induced mutagenesis through carrying out translesion DNA synthesis [18-  
280 19]. Ferritin peptide protect the cells from damage by excess iron through regulating the  
281 cellular and organism-wide iron homeostasis [20-23]. In addition, ferritin peptide has been also  
282 proven to play vital roles in development, cell activation, and angiogenesis [24-27]. Ferritin  
283 peptide showed the expression with highest mRNA level in hepatopancreas in *M. nipponense*,  
284 and proved to play critical roles in its innate immune defence, especially for those in cellular  
285 and organismic iron homeostasis [17]. In this study, the mRNA expression of Rev3 was the  
286 highest in hepatopancreas, and showed significant expression difference with that in other  
287 tissues ( $P < 0.01$ ). Rev3 also showed high expression in androgenic gland and testis. The  
288 dramatic high expression of Rev3 in hepatopancreas implies its potential roles in immune  
289 system in *M. nipponense*, which is similar with the previous studies. The ferritin peptide

290 showed the highest mRNA expression in testis, followed by in androgenic gland and  
291 hepatopancreas. However, there is no significant expression difference between the testis,  
292 androgenic gland, and hepatopancreas. A reasonable explanation for the different from  
293 previous study is that the tissues samples may collect at different season and have individual  
294 difference. The mRNA expression of GEM was the highest in androgenic gland, followed by  
295 testis and ovary. The high expression levels of these 3 DEPs in testis and androgenic gland  
296 suggested their potentially novel functions in male sexual development of *M. nipponense*,  
297 which have not yet been identified in any species. Besides, the mRNA expressions of these 3  
298 DEPs in reproductive seasons were dramatically higher than those in nonreproductive season,  
299 which also suggested their potential roles in testis development.

300         The *in situ* hybridization of ferritin peptide has been performed in several species. The  
301 *in situ* hybridization analysis in *Branchiostoma belcheri* showed that ferritin homolog is  
302 ubiquitously expressed [28]. Ferritin mRNA from *Pinctada fucata* is highly expressed at the  
303 mantle fold, revealed by the *in situ* hybridization analysis. The mantle fold is a region, playing  
304 essential roles in metal accumulation and contributing the metal incorporation into the shell  
305 [29]. In iron-loaded rats with up-regulated levels of L-ferritin mRNA, L-ferritin mRNA was  
306 localized in many organs, including colonic crypt, villus epithelial cells, small intestinal crypt  
307 and surface epithelial cells [30]. To the best of our knowledge, no previous studies focused on  
308 the *in situ* hybridization of GEM and Rev3 in any species. In this study, strong signals for Rev3  
309 mRNA were detected in spermatid, spermatocyte and sperm in mature testis, while strong  
310 signals for GME and ferritin peptide were only detected in spermatid. These results indicated  
311 that Rev3 promotes the testis development during the whole reproductive cycle of testis, while  
312 GME and ferritin peptide only promote the activation of testis development. Strong signals  
313 were detected in the funicular structure surrounding the androgenic gland cells for all of these  
314 three genes, while no signal was directly detected in androgenic gland cells. The histological

315 observation during the post-larval developmental stages of *M. nipponense* indicated that  
316 androgenic gland was developed at the post-larval day 10 (PL10) with the formation of  
317 funicular structure, then the androgenic gland cells were formed into the funicular structure,  
318 and the androgenic gland was matured at PL19 [31]. No signal in androgenic gland cells  
319 indicated that these three genes were not directly secreted by the androgenic gland, while the  
320 strong signals in funicular structure suggested their essential roles in the development of  
321 funicular structure, which promote and support the formation of androgenic gland cells. The  
322 strong signals in hepatopancreas cells suggested that important roles in immune system in *M.*  
323 *nipponense*. The similar expression pattern of these three genes in *M. nipponense* implies some  
324 relationship between each other.

### 325 **Conclusion**

326 We cloned and characterized GEM, Rev3 and ferritin peptide from the androgenic gland of *M.*  
327 *nipponense*. qPCR analysis of different tissues and reproductive cycles of testis suggested that  
328 these three genes may have additional functions in male sexual development in *M. nipponense*,  
329 which is the novel functions of these three genes and has not been reported in any species yet.  
330 In situ hybridization analysis further confirmed their important roles in male sexual  
331 development in *M. nipponense*.

332 **Funding:** This research was supported by grants by National Natural Science Foundation of  
333 China (Grant No. 31502154, 31572617); Central Public-interest Scientific Institution Basal  
334 Research Fund CAFS (2017JBF05); New varieties creation Major Project in Jiangsu province  
335 (PZCZ201745); the Science & Technology Supporting Program of Jiangsu Province  
336 (BE2016308); China Agriculture Research System-48 (CARS-48); Jiangsu Fisheries Research  
337 System-02 (JFRS-02).

338 **Acknowledgments:** We would like to acknowledge the technical support provided by Qifeng  
339 Wang and Biqiao Yao for his excellent technical support.

340 **Conflicts of Interest:** The authors declare that they have no conflict of interest.

## 341 **Reference**

- 342 1. Cai Y, Shokita S. Report on a collection of freshwater shrimps (Crustacea: Decapoda:  
343 Caridea) from the Philippines, with descriptions of four new species. Raffles. B. Zool.  
344 2006. 54: 245–270.
- 345 2. Grave SD, Ghane A. The establishment of the oriental river prawn, *Macrobrachium*  
346 *nipponense* (de Haan, 1849) in Anzali Lagoon, Iran. Aquat. Invasions. 2006. 1(4): 204–  
347 208.
- 348 3. Salman SD, Page TJ, Naser MD, Yasser AG. The invasion of *Macrobrachium nipponense*  
349 (De Haan, 1849) (Caridea: Palaemonidae) into the southern Iraqi marshes. Aquat.  
350 Invasions. 2006. 1(3): 109-115.
- 351 4. Ma KY, Feng JB, Lin JY, Li JL. The complete mitochondrial genome of *Macrobrachium*  
352 *nipponense*. Gene. 2011. 487(2): 160–165.
- 353 5. Yu H, Miyake S. Five species of the genus *Macrobrachium* (Crustacea, Decapoda,  
354 Palaemonidae) from Taiwan. Ohmu. 1972. 3: 45-55.
- 355 6. Bureau of Fisheries, Ministry of Agriculture, P.R.C. Fisheries economic statistics. In: China  
356 Fishery Yearbook. Beijing China Agricultural Press. 236 (2016).
- 357 7. Sagi A, Cohen D, Milner Y. Effect of androgenic gland ablation on morphotypic  
358 differentiation and sexual characteristics of male freshwater prawns, *Macrobrachium*  
359 *rosenbergii*. Gen. Comp. Endocr. 1990. 77: 15–22.

- 360 8. Sagi A, Cohen D, Wax Y. Production of *Macrobrachium rosenbetgii* in momosex population:  
361 yield characteristes under intensive monoculture conditions in cages. *Aquaculture*. 1986.  
362 51(3-4): 265-275.
- 363 9. Sagi A, Cohen D. Growth, maturation and progeny of sex-reversed *Macrobrachium*  
364 *rosenbetgii* males. *World Aquaculture*. 1990. 21(4): 87-90.
- 365 10. Jin SB, Fu HT, Zhou Q, Sun SM, Jiang SF, Xiong YW, et al. Transcriptome Analysis of  
366 Androgenic Gland for Discovery of Novel Genes from the Oriental River Prawn,  
367 *Macrobrachium nipponense*, Using Illumina Hiseq 2000. *PLoS One*. 2013. 8(10):  
368 e76840.
- 369 11. Jin SB, Fu HT, Jiang SF, Xiong YW, Qiao H, Zhang WY, et al. Identification of androgenic  
370 gland microRNAs and their targeted genes for discovery of sex-related microRNAs in  
371 oriental river prawn, *Macrobrachium nipponense*. *Gen. Mol. Res.* 2015. 14(4): 18396-  
372 18406.
- 373 12. Jin SB, Jiang SF, Xiong YW, Qiao H, Sun SM, Zhang WY, et al. Molecular cloning of two  
374 tropomyosin family genes and expression analysis during development in oriental river  
375 prawn, *Macrobrachium nipponense*. *Gene*. 2014. 546: 390-397.
- 376 13. Jin SB, Fu HT, Jiang SF, Xiong YW, Sun SM, Qiao H, et al. Molecular Cloning,  
377 Expression, and In Situ Hybridization Analysis of Forkhead Box Protein L2 during  
378 Development in *Macrobrachium nipponense*. *J. World Aquacult. Soc.* 2018. 49 (10).
- 379 14. Li FJ, Bai HK, Xiong YW, Fu HT, Jiang SF, Jin SB, et al. Molecular characterization of  
380 insulin-like androgenic gland hormone-binding protein gene from the oriental river  
381 prawn *Macrobrachium nipponense* and investigation of its transcriptional relationship  
382 with the insulin-like androgenic gland hormone gene. *Gen. Comp. Endocr.* 2015. 216(6):  
383 152-160.



- 384 15. Ma KY, Li JL, Qiu GF. Identification of putative regulatory region of insulin-like  
385 androgenic gland hormone gene (IAG) in the prawn *Macrobrachium nipponense* and  
386 proteins that interact with IAG by using yeast two-hybrid system. *Gen. Comp. Endocr.*  
387 2016. 229: 112-118.
- 388 16. Jin SB, Fu HT, Sun SM, Jiang SF, Xiong YW, Qiao H, et al. iTRAQ-based quantitative  
389 proteomic analysis of the androgenic glands of the oriental river prawn, *Macrobrachium*  
390 *nipponense*, during nonreproductive and reproductive seasons. *Comp. Biochem. Physiol.*  
391 *D.* 2018. 26: 50-57.
- 392 17. Sun SM, Gu ZM, Fu HT, Zhu J, Xuan FJ, Ge XP. Identification and characterization of a  
393 *Macrobrachium nipponense* ferritin subunit regulated by iron ion and pathogen challenge.  
394 *Fish Shellfish Immun.* 2014. 40: 288-295.
- 395 18. Kawamura K, Wang JO, Bahar R, Koshikawa N, Shishikura T, Nakagawara A, et al. The  
396 error-prone DNA polymerase zeta catalytic subunit (Rev3) gene is ubiquitously  
397 expressed in normal and malignant human tissues. *Int. J. Oncol.* 2001. 18(1): 97-103.
- 398 19. Tamuli R, Kasbekar D. Dominant suppression of repeat-induced point mutation in  
399 *Neurospora crassa* by a variant catalytic subunit of DNA polymerase-zeta. *Genetics.*  
400 2008. 178(3): 1169-76.
- 401 20. Kakhlon O, Gruenbaum Y, Cabantchik ZI. Repression of the heavy ferritin chain increases  
402 the labile iron pool of human K562 cells. *Biochem. J.* 2001. 356: 311-6.
- 403 21. Konijn AM, Glickstein H, Vaisman B, Meyron-Holtz EG, Slotki IN, Cabantchik ZI. The  
404 cellular labile iron pool and intracellular ferritin in K562 cells. *Blood.* 1999. 94: 2128-  
405 34.

- 406 22. Picard V, Renaudie F, Porcher C, Hentze MW, Grandchamp B, Beaumont C.  
407 Overexpression of the ferritin H subunit in cultured erythroid cells changes the  
408 intracellular iron distribution. *Blood*. 1996. 87: 2057-64.
- 409 23. Torti FM, Torti SV. Regulation of ferritin genes and protein. *Blood*. 2002. 99: 3505-16.
- 410 24. Alkhateeb AA, Connor JR. Nuclear ferritin: a new role for ferritin in cell biology. *Biochim.*  
411 *Biophys. Acta*. 2010. 1800: 793-7.
- 412 25. Coffman LG, Brown JC, Johnson DA, Parthasarathy N, D'Agostino RB Jr, Lively MO, et  
413 al. Cleavage of high-molecular-weight kininogen by elastase and tryptase is inhibited by  
414 ferritin. *Am. J. Physiol. Lung. Cell. Mol. Physiol*. 2008. 294: L505-15.
- 415 26. Parthasarathy N, Torti SV, Torti FM. Ferritin binds to light chain of human Hkininogen  
416 and inhibits kallikrein-mediated bradykinin release. *Biochem. J*. 2002. 365: 279-86.
- 417 27. Wang W, Knovich MA, Coffman LG, Torti FM, Torti SV. Serum ferritin: past, present and  
418 future. *Biochim. Biophys. Acta*. 2010. 1800: 760-9.
- 419 28. Li M, Saren GW, Zhang SC. Identification and expression of a ferritin homolog in  
420 amphioxus *Branchiostoma belcheri*: Evidence for its dual role in immune response and  
421 iron metabolism. *Comp. Biochem. Phys. B*. 2008. 150: 263–270.
- 422 29. Zhang Y, Meng QX, Jiang TM, Wang HZ, Xie LP, Zhang RQ. A novel ferritin subunit  
423 involved in shell formation from the pearl oyster (*Pinctada fucata*). *Comp. Biochem.*  
424 *Phys. B*. 2003. 135(1): 43-54.
- 425 30. Jeffrey GP, Basclain KA, Allen TL. Molecular regulation of transferrin receptor and ferritin  
426 expression in the rat gastrointestinal tract. *Gastroenterology*. 1996. 110(3): 790-800.

427 31. Jin SB, Zhang Y, Guan HH, Fu HT, Jiang SF, Xiong YW, et al. Histological Observation  
428 of Gonadal Development During Post-larva in Oriental River Prawn, *Macrobrachium*  
429 *nipponense*. Chinese J. Fisher. 2016. 29(4): 11-16.

430

431

432

433

434

435

436

437

438

439

440

441

442

443

444

445

446

447

448

449

450

451

452

453

454

455 Table 1. Universal and specific primers used in this study

| Primer name           | Nucleotide Sequence(5'→3')             | Purpose                            |
|-----------------------|----------------------------------------|------------------------------------|
| GEM-3GSP1             | AGTATGGGAGGCTCGTCAGT                   | FWD first primer for GEM 3' RACE   |
| GEM -3GSP2            | ATGCCCAGTGGCTAGAAGTG                   | FWD second primer for GEM 3' RACE  |
| GEM -5GSP1            | AATGCTCCAGTTCCTTTGCCT                  | RVS first primer for GEM 5' RACE   |
| GEM -5GSP2            | CCTGTCCGATATGCTCCGTC                   | RVS second primer for GEM 5' RACE  |
| Rev3-3GSP1            | CCATCTACTCCCATGGTATGT                  | FWD first primer for Rev3 3' RACE  |
| Rev3 -3GSP2           | ATCCATTGACTGCCCTATCATT                 | FWD second primer for Rev3 3' RACE |
| 3'RACE OUT            | TACCGTCGTTCCACTAGTGATT                 | RVS first primer for 3' RACE       |
| 3'RACE IN             | CGCGGATCCTCCACTAGTGATTTCATATAGG        | RVS second primer for 3' RACE      |
| 5'RACE OUT            | CATGGCTACATGCTGACAGCCTA                | FWD first primer for 5' RACE       |
| 5'RACE IN             | CGCGGATCCACAGCCTACTGATGATCAGTCGATG     | FWD second primer for 5' RACE      |
| GEM-RTF               | ATGCCCAGTGGCTAGAAGTG                   | FWD primer for GEM expression      |
| GEM-RTR               | GCAGAATCCAGCGATGCTCT                   | RVS primer for GEM expression      |
| Rev3-RTF              | AGTGACAGCAACGCTAGTGG                   | FWD primer for Rev3 expression     |
| Rev3-RTR              | GGCCAAACAACCTCTGTCAGC                  | RVS primer for Rev3 expression     |
| Rev3-RTF              | CCGAAATCCGCCAGAACTAC                   | FWD primer for Ferritin expression |
| Rev3-RTR              | GCTTATCGGCATGCTCTCTC                   | RVS primer for Ferritin expression |
| β-actinF              | TATGCACTTCCTCATGCCATC                  | FWD primer for β-actin expression  |
| β-actinR              | AGGAGGCGGCAGTGGTCAT                    | RVS primer for β-actin expression  |
| GEM anti-sense Probe  | GCACTGACGAGCCTCCATACTACATGCTGAAGATAC   | Probe for GEM ISH analysis         |
| GEM sense Probe       | GTATCTTCAGCATGTAGTATGGGAGGCTCGTCAGTGC  | Probe for GEM ISH analysis         |
| Rev3 anti-sense Probe | CATCTAATCCCTGCGAAGAGCCTGAAGGAACTTGTGAG | Probe for Rev3 ISH analysis        |
| Rev3 sense Probe      | CTCACAAGTTCCTTCAGGCTCTTCGCAGGGATTAGATG | Probe for Rev3 ISH analysis        |
| Fer anti-sense Probe  | GCTGGCATAACAATCCATGTTGATCTGCTGTTAATG   | Probe for Ferritin ISH analysis    |
| Fer sense Probe       | CATTAACAAGCAGATCAACATGGAATTGTATGCCAGC  | Probe for Ferritin ISH analysis    |

456 Table 2. Amino acid sequence used for phylogenetic analysis of GEM

| Species                            | Accession Number |
|------------------------------------|------------------|
| <i>Macrobrachium nipponense</i>    |                  |
| <i>Acanthaster planci</i>          | XP_022103928.1   |
| <i>Xenopus laevis</i>              | XP_018087535.1   |
| <i>Stylophora pistillata</i>       | XP_022804116.1   |
| <i>Odobenus rosmarus divergens</i> | XP_004399834.1   |
| <i>Pomacea canaliculate</i>        | XP_025106566.1   |
| <i>Centruroides sculpturatus</i>   | XP_023219163.1   |
| <i>Biomphalaria glabrata</i>       | XP_013071285.1   |
| <i>Aplysia californica</i>         | XP_005105416.1   |
| <i>Mizuhopecten yessoensis</i>     | XP_021367489.1   |
| <i>Xenopus tropicalis</i>          | NP_001096228.1   |
| <i>Xenopus laevis</i>              | NP_001087945.2   |
| <i>Mus musculus</i>                | NP_079932.2      |
| <i>Mus caroli</i>                  | XP_021034811.1   |

457

458

459

460

461

462

463

464

465

466

467

468 Table 3. Amino acid sequence used for phylogenetic analysis of GEM

| Species                         | Accession Number |
|---------------------------------|------------------|
| <i>Macrobrachium nipponense</i> |                  |
| <i>Kryptolebias marmoratus</i>  | XP_024866820.1   |
| <i>Chaetura pelagica</i>        | KFU85727.1       |
| <i>Falco cherrug</i>            | XP_014140871.1   |
| <i>Podiceps cristatus</i>       | KFZ50056.1       |
| <i>Merops nubicus</i>           | KFQ35536.1       |
| <i>Fulmarus glacialis</i>       | XP_009579679.1   |
| <i>Sinocyclocheilus graham</i>  | XP_016087315.1   |
| <i>Poecilia Mexicana</i>        | XP_014866147.1   |
| <i>Falco peregrinus</i>         | XP_013160015.1   |

469

470

471

Fig. 1: The construction of phylogenetic tree from different organisms based on amino acid sequence comparisons. Species names are listed on the right of the tree. A indicated the phylogenetic tree of GEM; B indicated the phylogenetic tree of Rev3.

Fig. 2: Expression characterizations in the various adult tissues were revealed by real-time quantitative PCR. The amount of mRNA was normalized to the  $\beta$ -actin transcript level. Data are shown as mean  $\pm$ SD (standard deviation) of tissues in three separate individuals. Capital letters indicate expression difference of Mn-Foxl2 in different adult tissues. A indicated the expression characterization of GEM; B indicated the expression characterization of Rev3; C indicated the expression characterization of ferritin peptide.

Fig. 3: Expression characterizations at various reproductive cycle of testis were revealed by real-time quantitative PCR. The amount of mRNA was normalized to the  $\beta$ -actin transcript level. Data are shown as mean  $\pm$  SD (standard deviation) of tissues from three separate individuals. Capital letters indicate expression difference of testes from control group.

Fig. 4: Location of GEM gene was detected in testis, androgenic gland and hepatopancreas of *M. nipponense* by in situ hybridization. Testis, androgenic gland and hepatopancreas were sampled at reproductive season. AG: androgenic gland; ST: spermatid; SC: spermatocyte; SP: sperm; M: muscle; C: androgenic gland cell; FS: Funicular structure; He: hepatopancreas; LG: lipid granules; HC: hepatocytes. Scale bars = 50  $\mu$ m.

Fig. 5: Location of Rev3 gene was detected in testis, androgenic gland and hepatopancreas of *M. nipponense* by in situ hybridization. Testis, androgenic gland and hepatopancreas were sampled at reproductive season. AG: androgenic gland; ST: spermatid; SC: spermatocyte; SP: sperm; M: muscle; C: androgenic gland cell; FS: Funicular structure; He: hepatopancreas; LG: lipid granules; HC: hepatocytes. Scale bars = 50  $\mu$ m.

Fig. 6: Location of ferritin peptide gene was detected in testis, androgenic gland and hepatopancreas of *M. nipponense* by in situ hybridization. Testis, androgenic gland and

hepatopancreas were sampled at reproductive season. AG: androgenic gland; ST: spermatid;  
SC: spermatocyte; SP: sperm; M: muscle; C: androgenic gland cell; FS: Funicular structure;  
He: hepatopancreas; LG: lipid granules; HC: hepatocytes. Scale bars = 50  $\mu$ m.



Figure 1

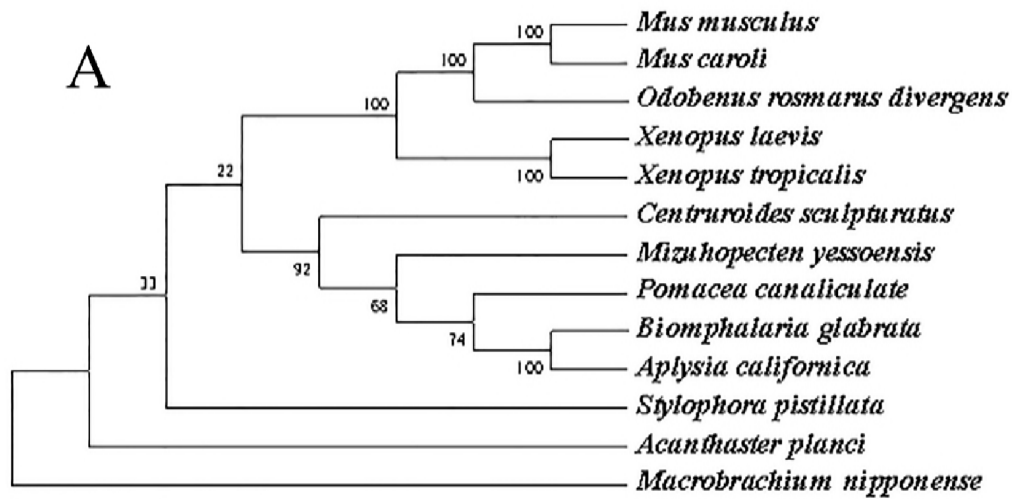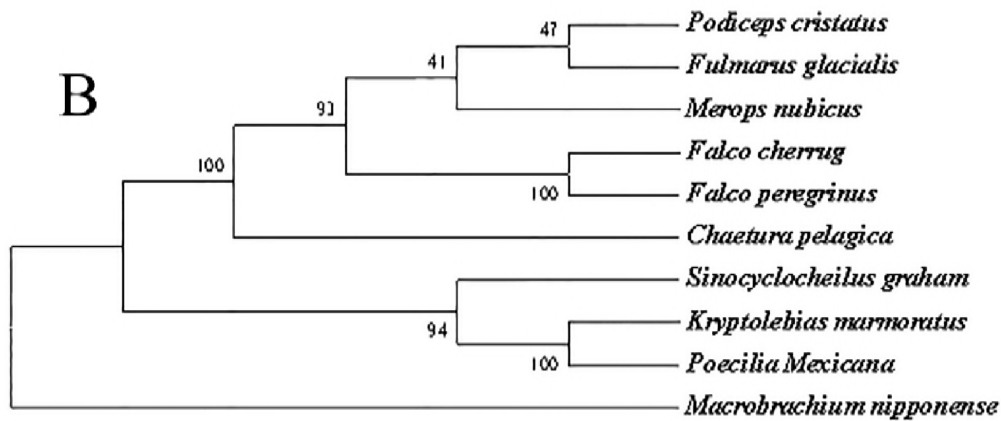

Figure 2

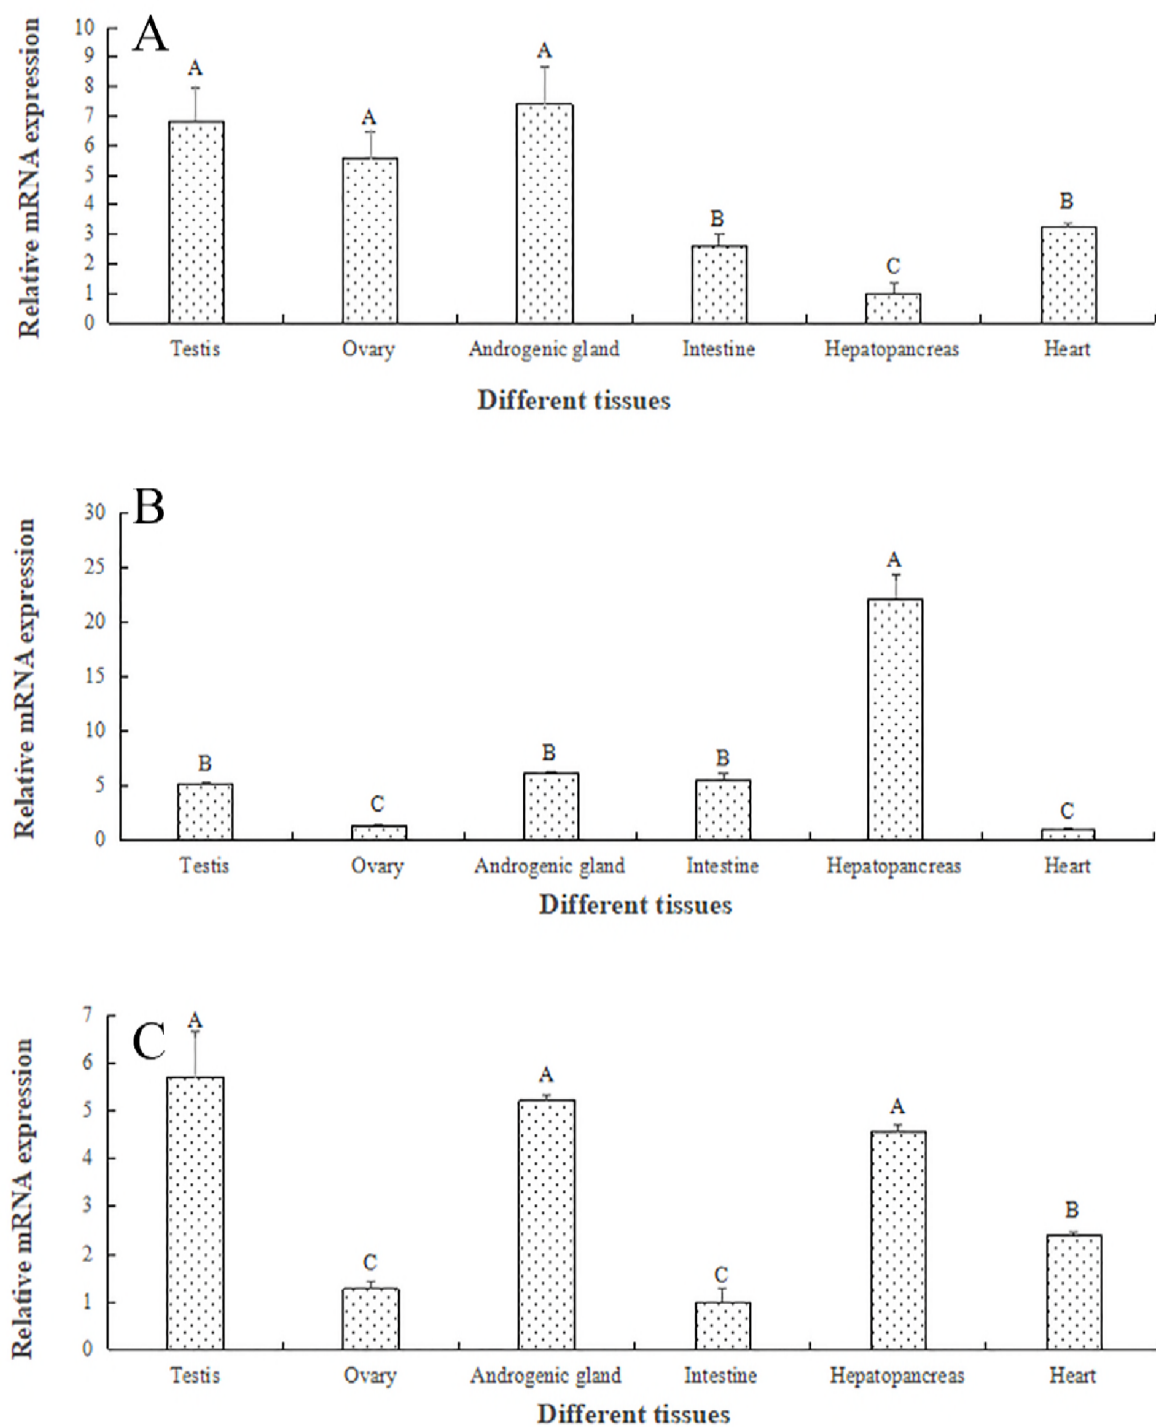

Figure 3

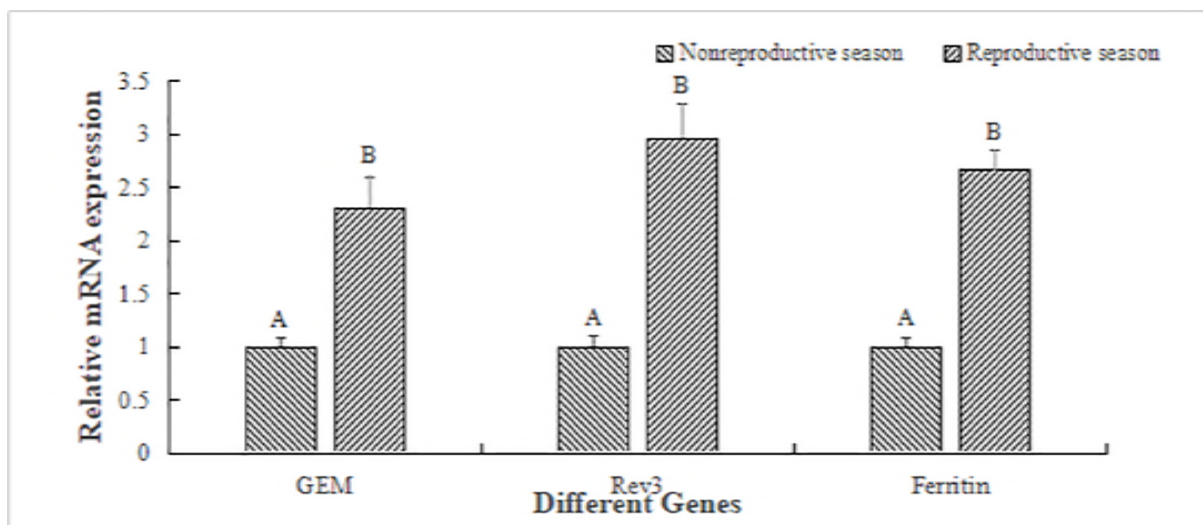

Figure 4

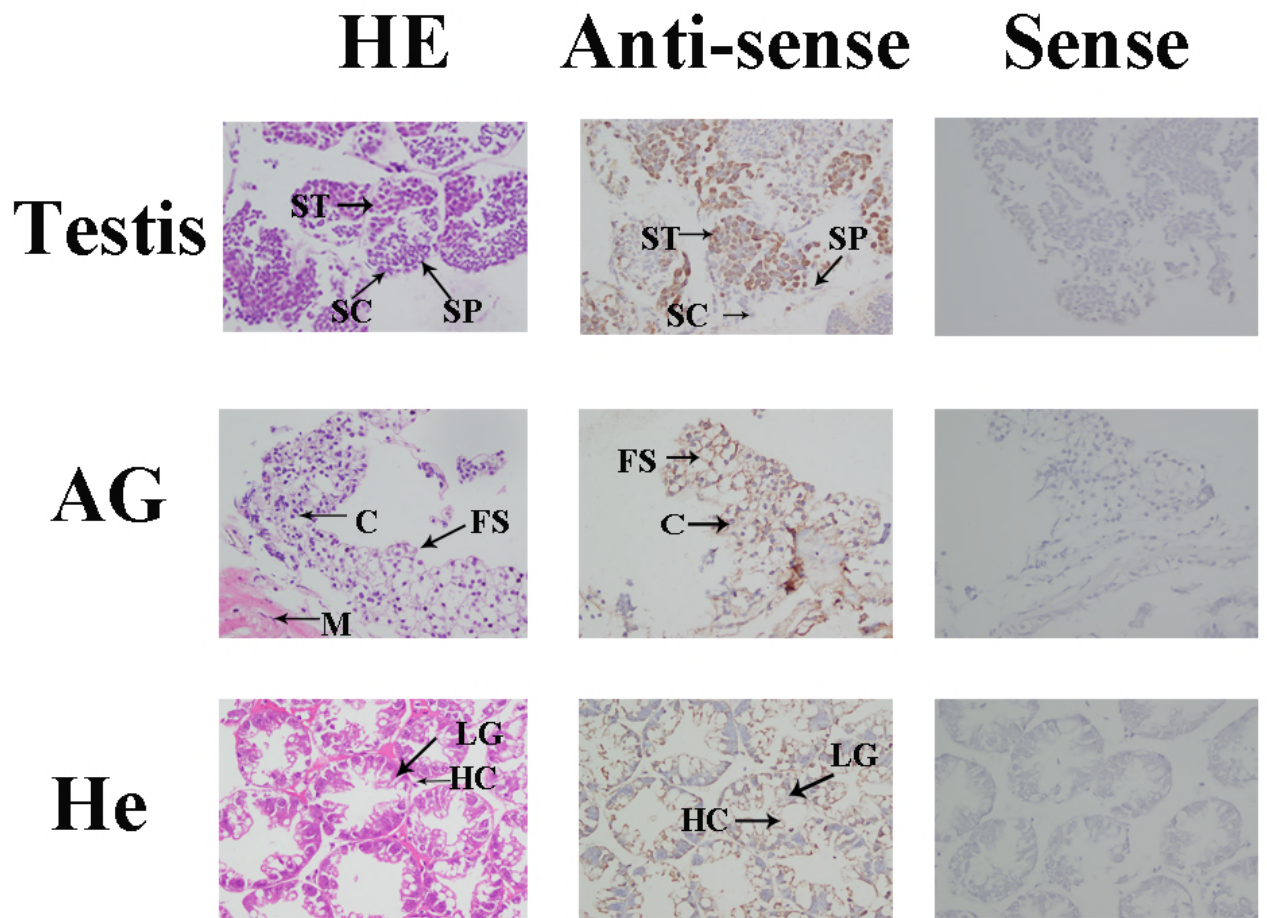

Figure 5

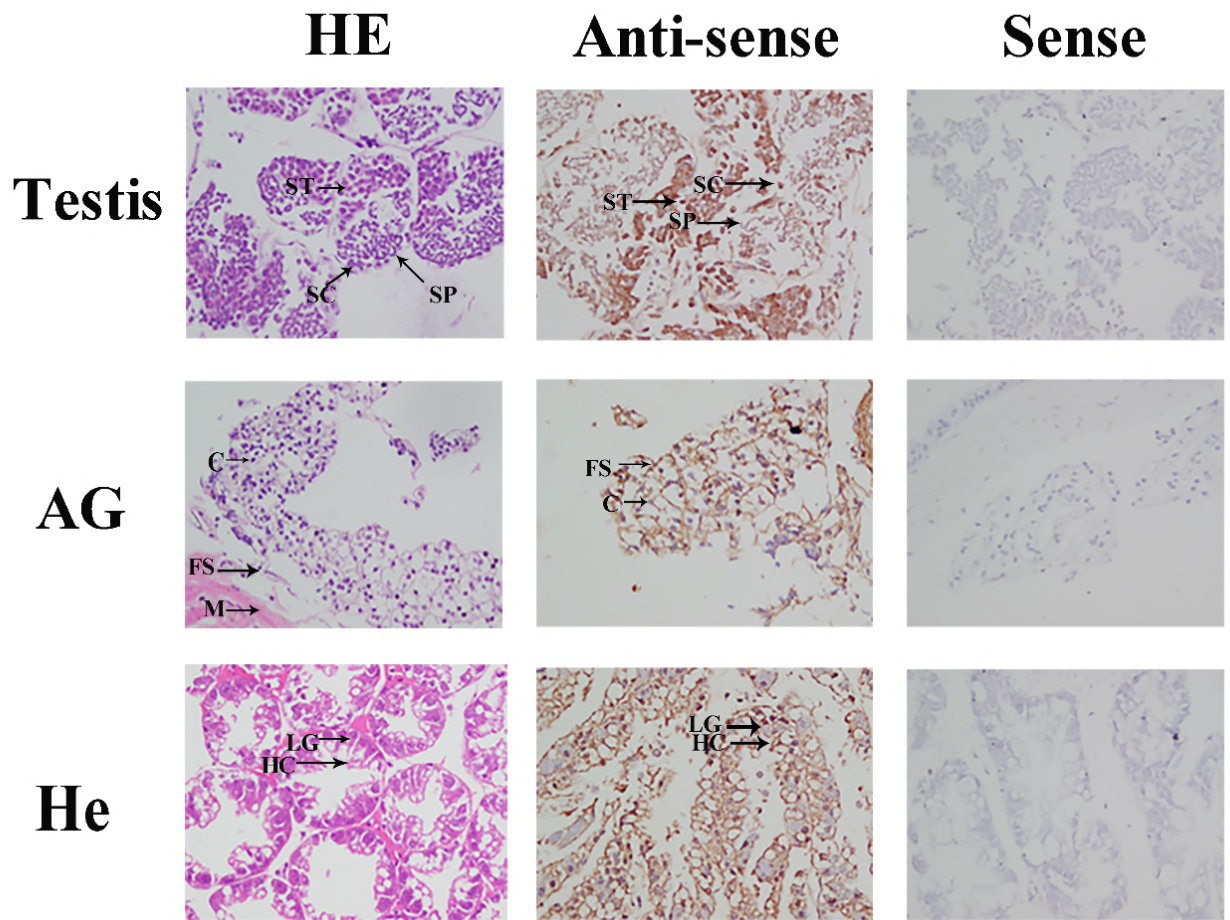

Figure 6

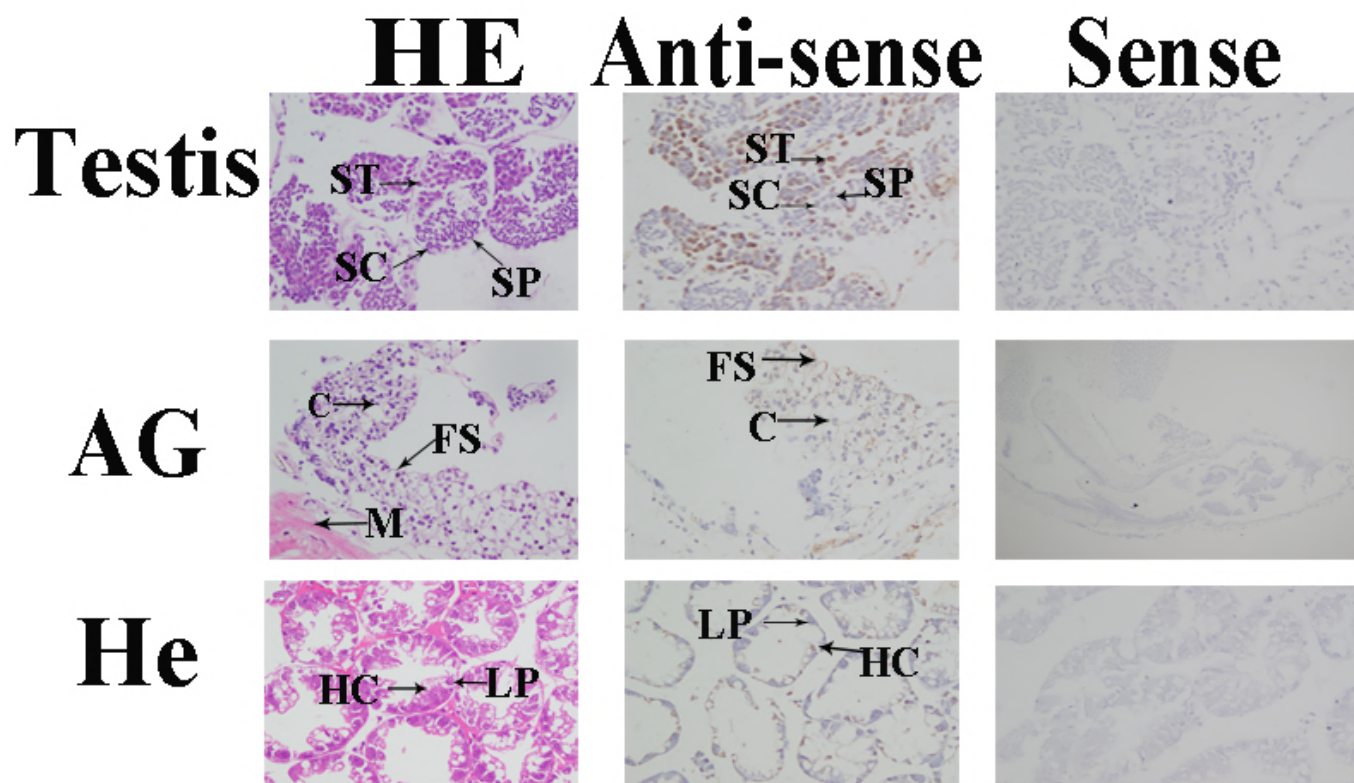

Source: https://www.biorxiv.org/content/10.1101/441147v1.full.pdf
